# Supplementary material for: Neuroprotection by chronic administration of Fluoroethylnormemantine (FENM) in mouse models of Alzheimer's disease
Source: PubMed Central journal article supplement — Alzheimers Res Ther. 2025 Jan 6;17:7. doi: 10.1186/s13195-024-01648-9 (PMC11702188; doi:10.1186/s13195-024-01648-9), 2025-01-06
Supplement: 13195_2024_1648_MOESM1_ESM.pdf [file 13195_2024_1648_MOESM1_ESM.pdf]

Figure 6D NitroTyrosine

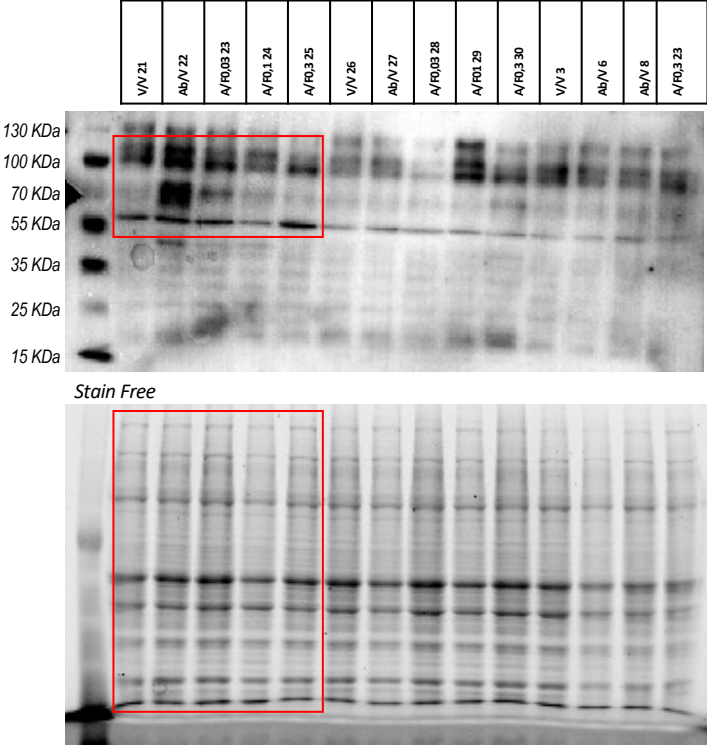

21121702

**Figure 4A PSD-95**

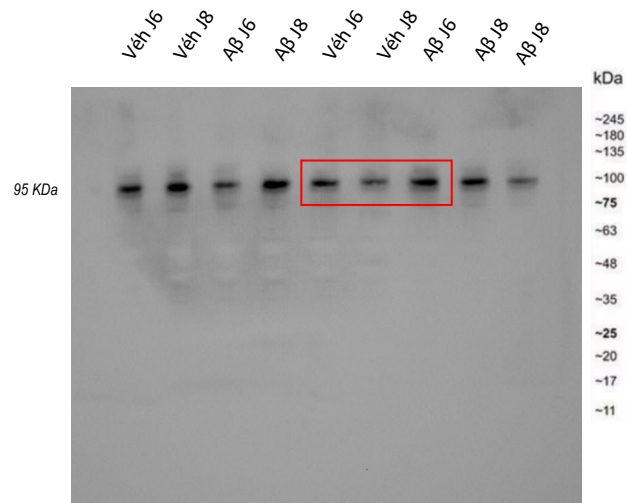

**Figure 4B GluN2A**

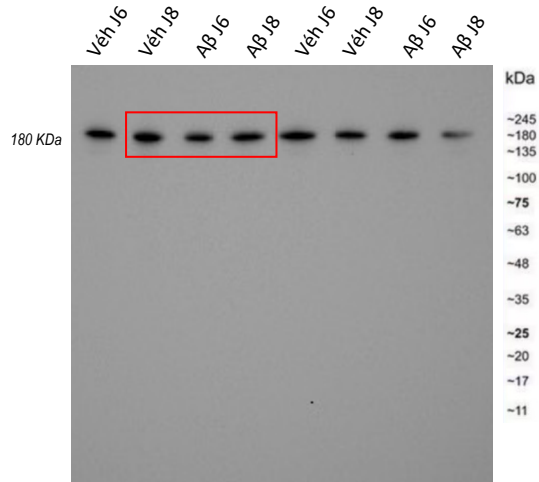

**Figure 4C GluN2B**

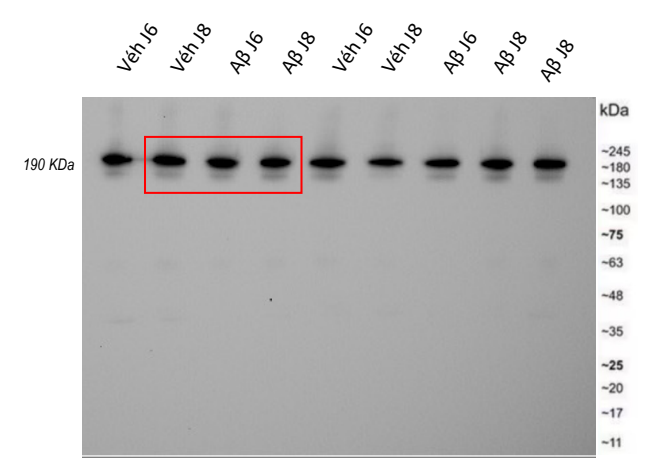

Stain Free

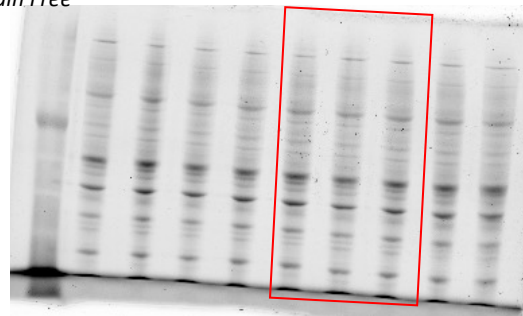

22062202

Stain Free

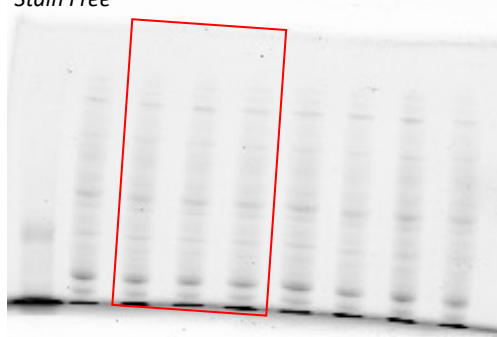

22060203

Stain Free

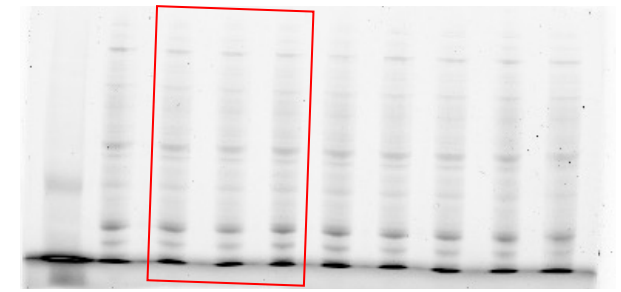

22052506

**Figure 4E PSD-95**

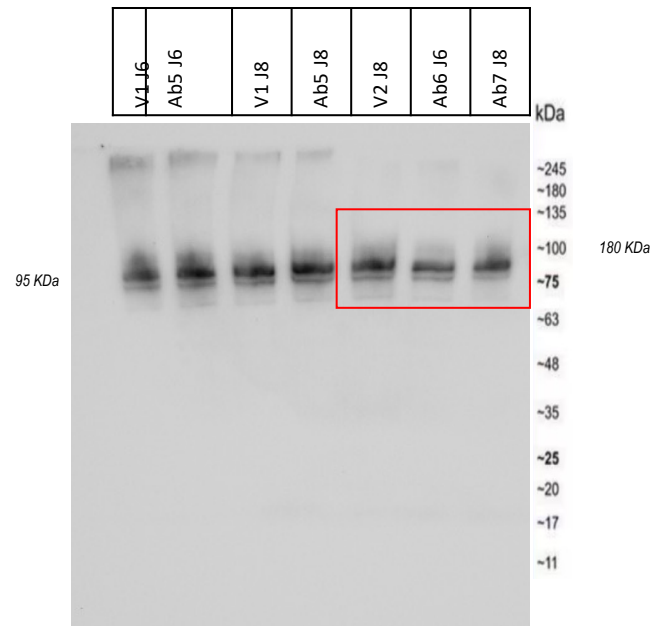

Stain Free

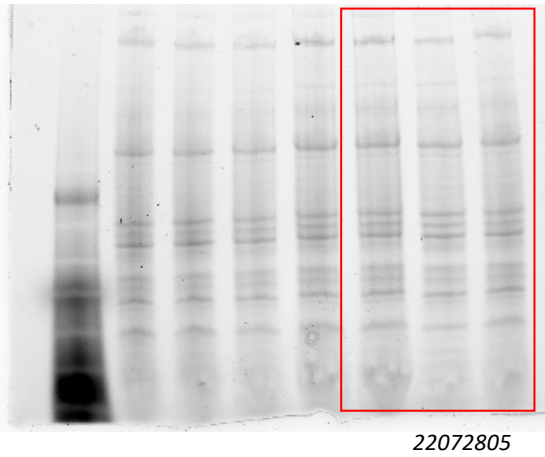

**Figure 4F GluN2A**

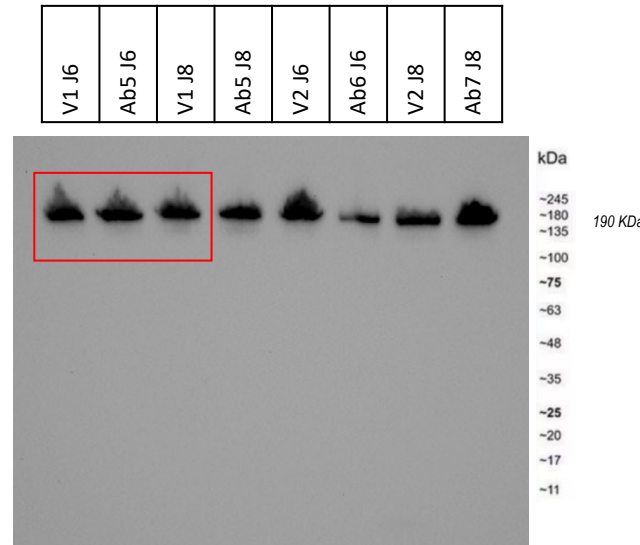

Stain Free

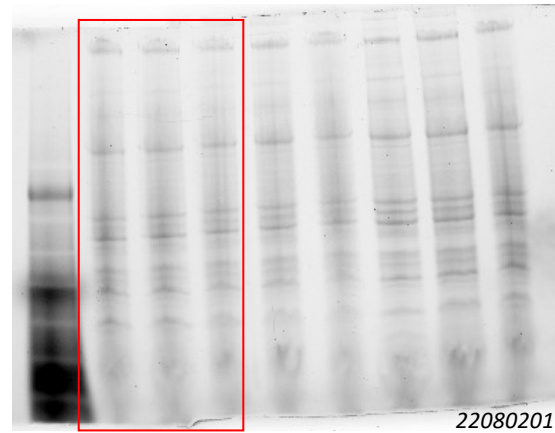

**Figure 4G GluN2B**

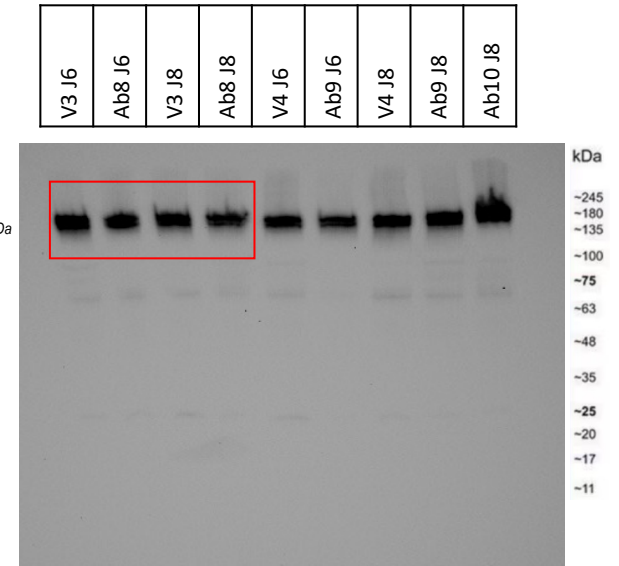

Stain Free

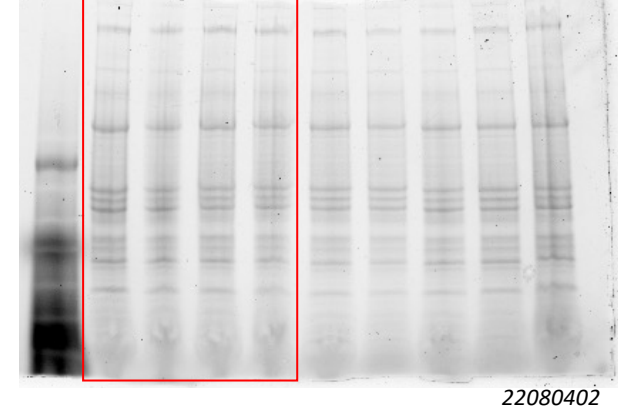

**Figure 5A PSD95**

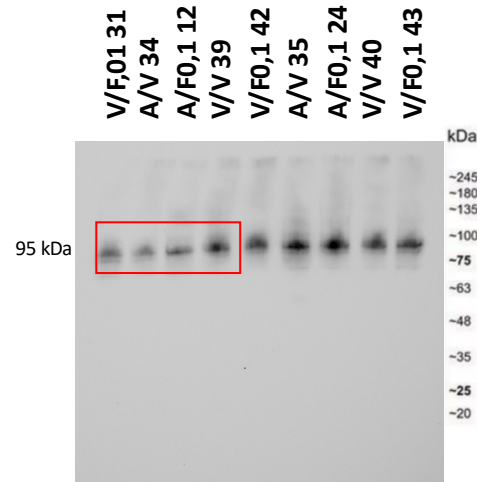

*Stain Free*

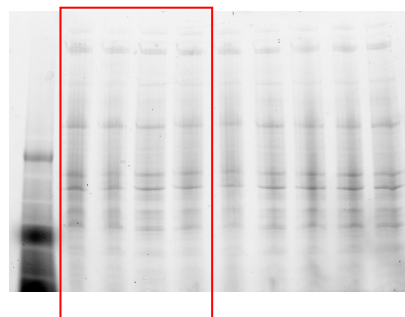

22100502 PSD95

**Figure 5B GluN2A**

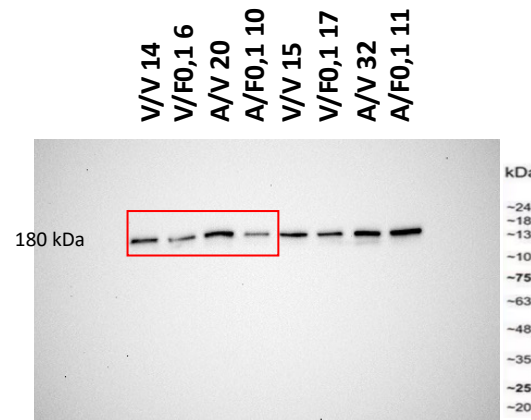

*Stain Free*

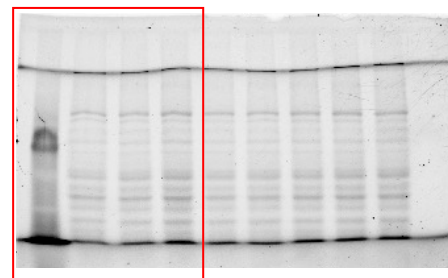

230321\_01 GluN2A

**Figure 5C GluN2B**

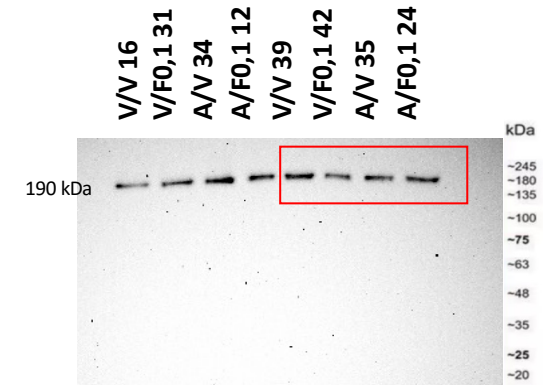

*Stain Free*

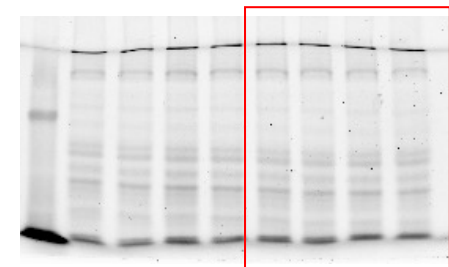

230324\_05 GluN2B-P

**Figure 5E GluN2D**

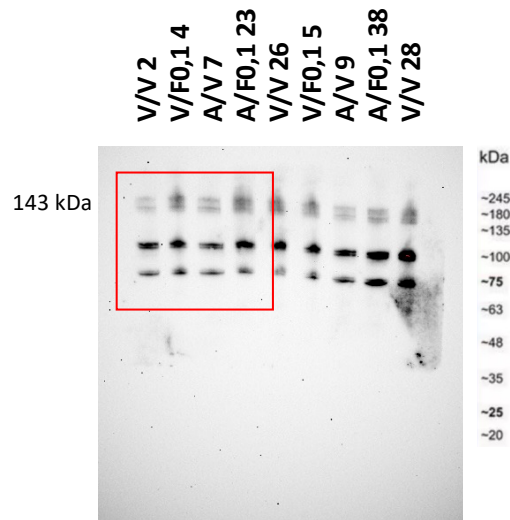

Stain Free

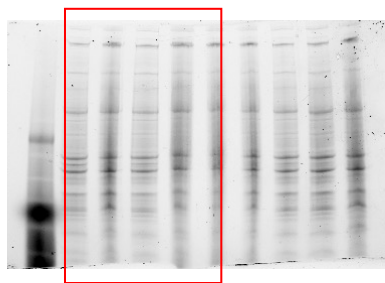

22120803 GluN2D

**Figure 5F P-GluN2A**

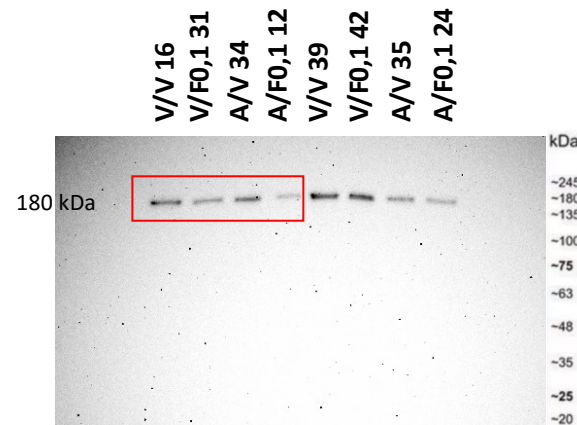

Stain Free

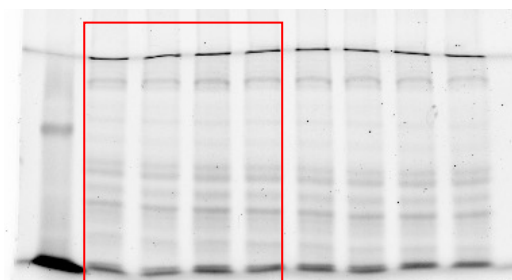

230322\_05 GluN2A-P

**Figure 5G P-GluN2B**

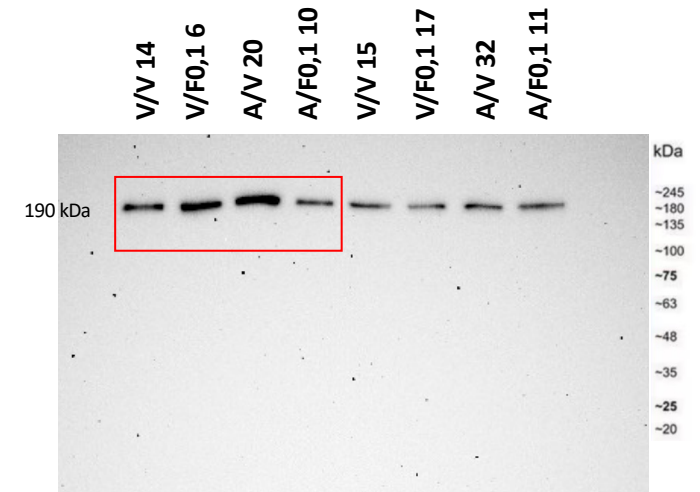

Stain Free

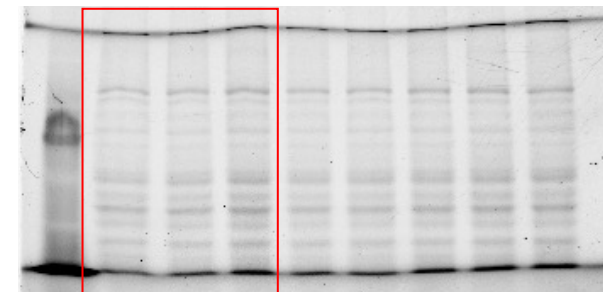

230324\_01 GluN2B-P
